# Supplementary material
Source: PubMed Central journal article supplement (PMC3070582)
Supplement: mmc3.pdf [file mmc3.pdf]

# Supplemental Fig 3

A

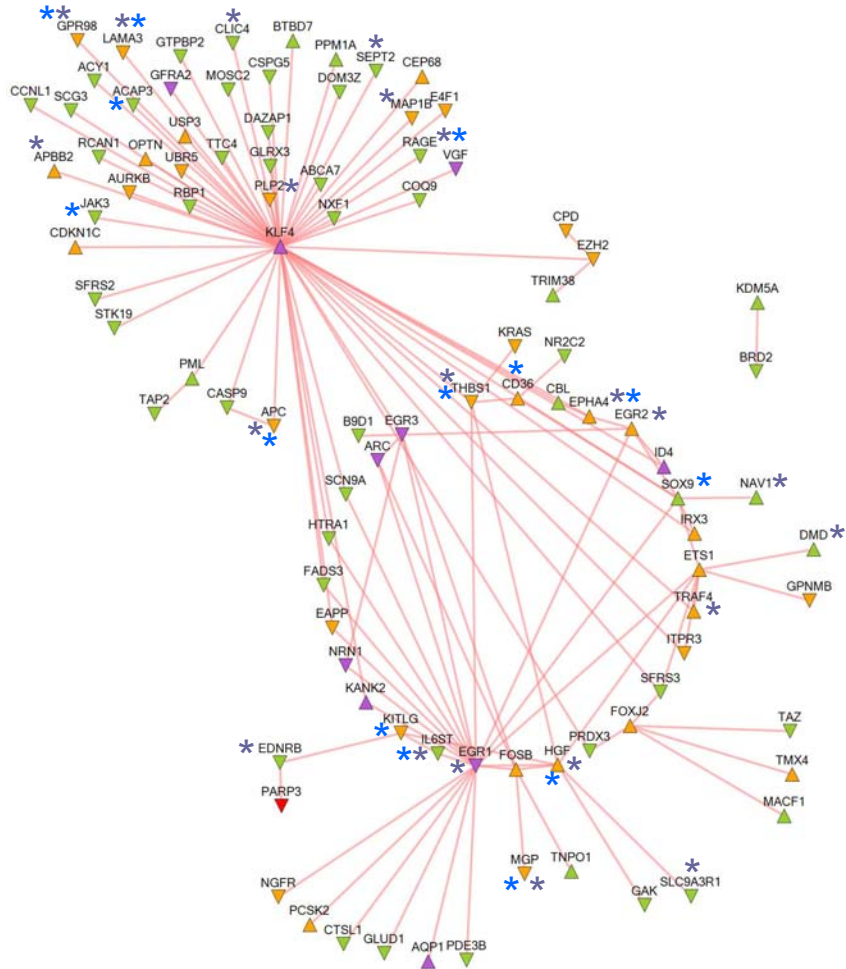

B

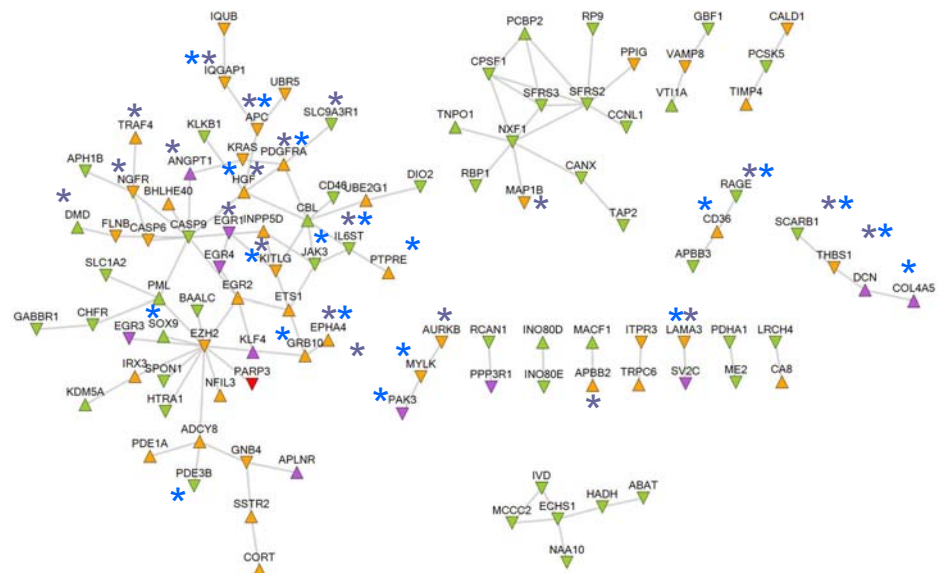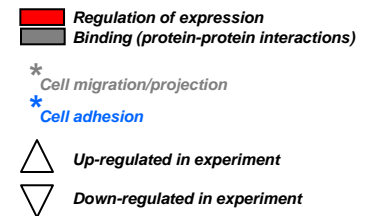

- Genes changing in response to PGRN treatment (Rat)
- Gene expression of medial temporal lobe of FTD patients (Bronner et. al., PLoS ONE 2009)
- Genes within the top 20 transcripts showing differential expression in FTL-D-U (Chen-Plotkin et. al. Human Mol Genet 2008)
- Down-regulated in both medial temporal lobe of FTD patients and following treatment of PGRN rat cortical cultures
