# Supplementary material
Source: PubMed Central journal article supplement (PMC3070582)

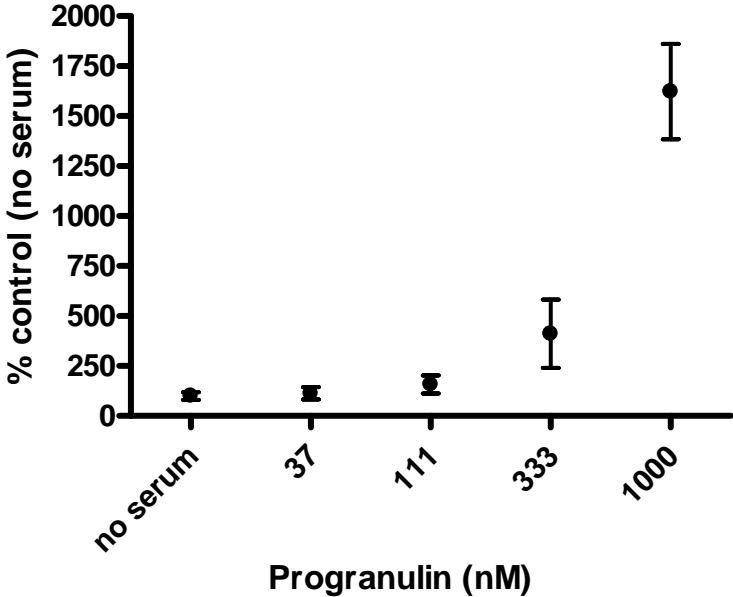

Supplement: mmc1.pdf [file mmc1.pdf]

Supplemental Fig 2

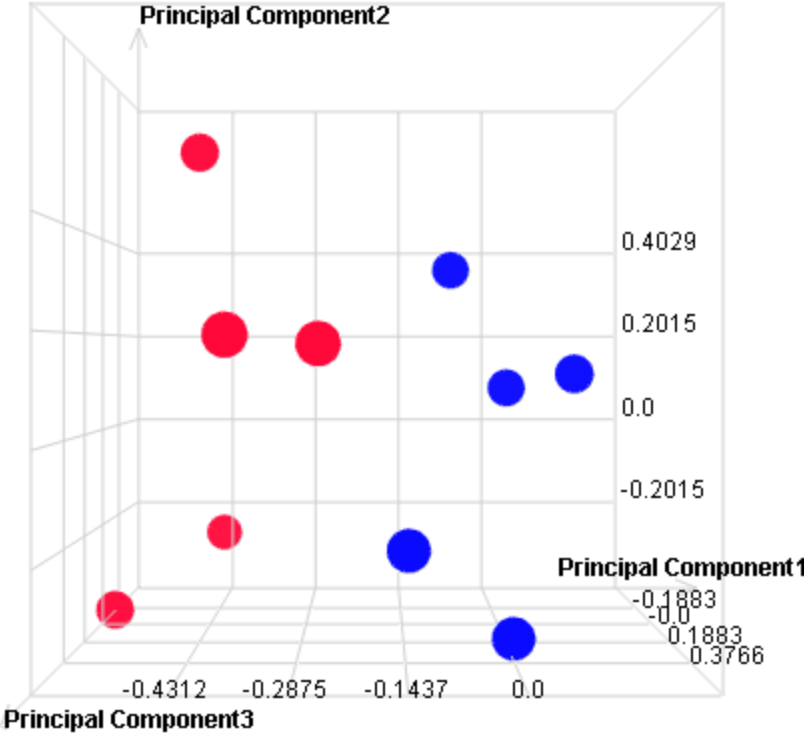

- *PGRN*
- *PBS*

Supplement: mmc2.pdf [file mmc2.pdf]

Supplemental Fig 4

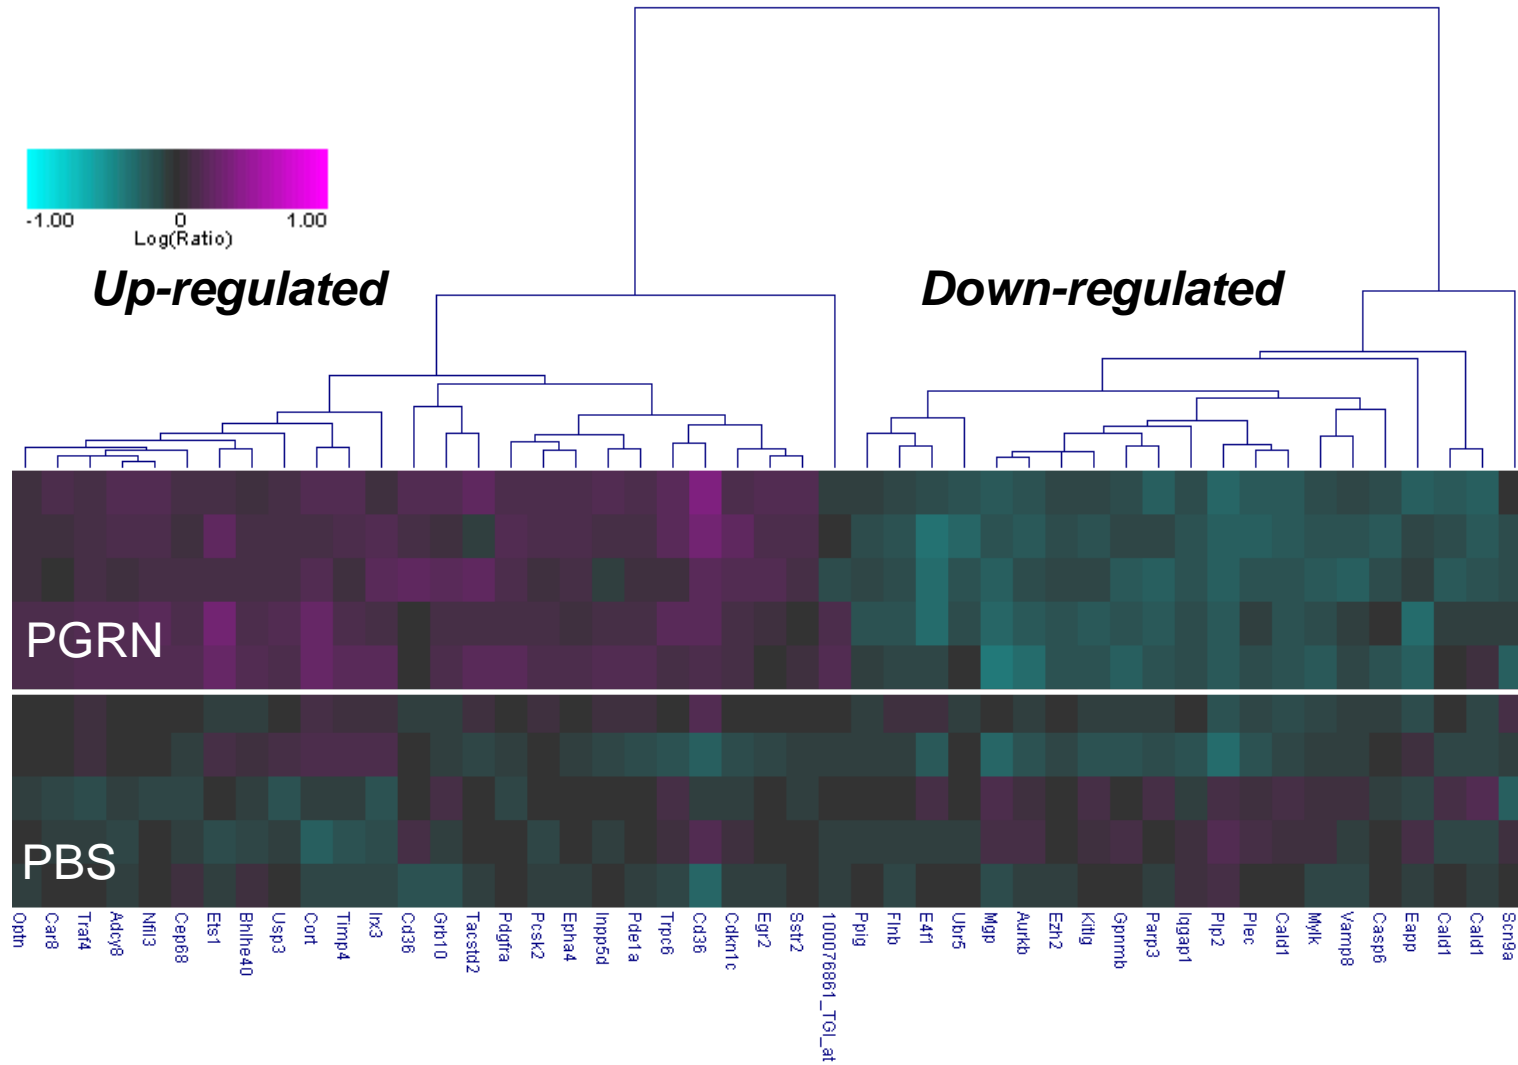

Supplement: mmc4.pdf [file mmc4.pdf]

Supplemental Fig 5

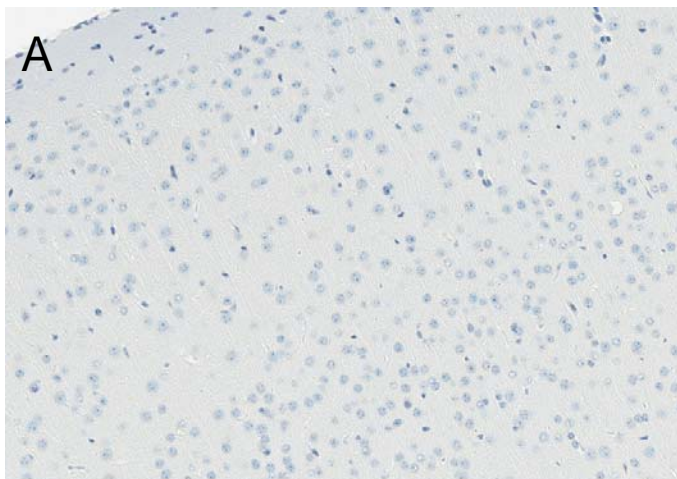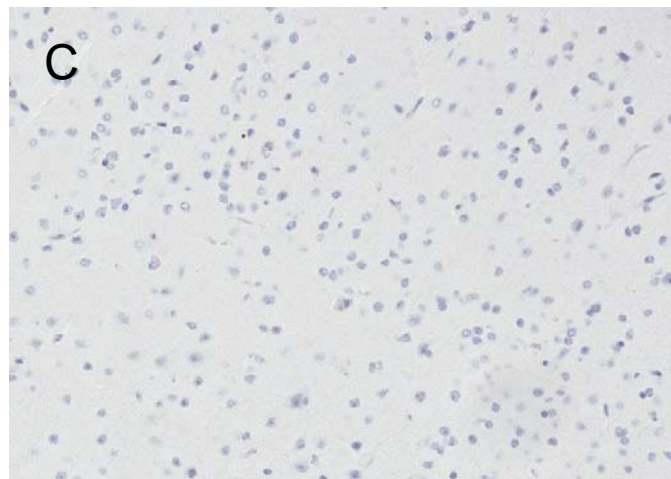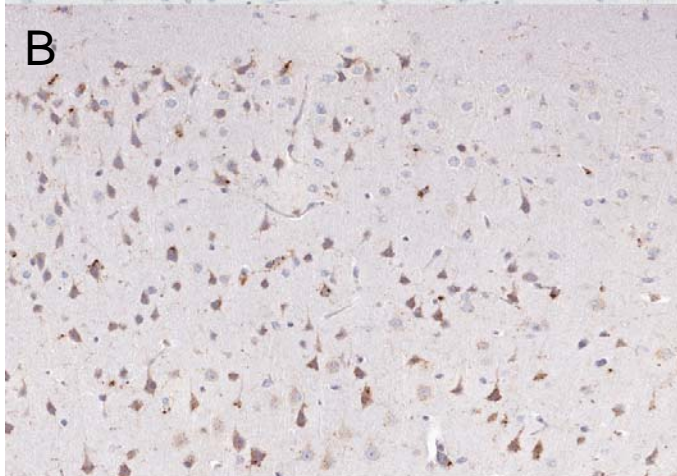

Supplement: mmc5.pdf [file mmc5.pdf]

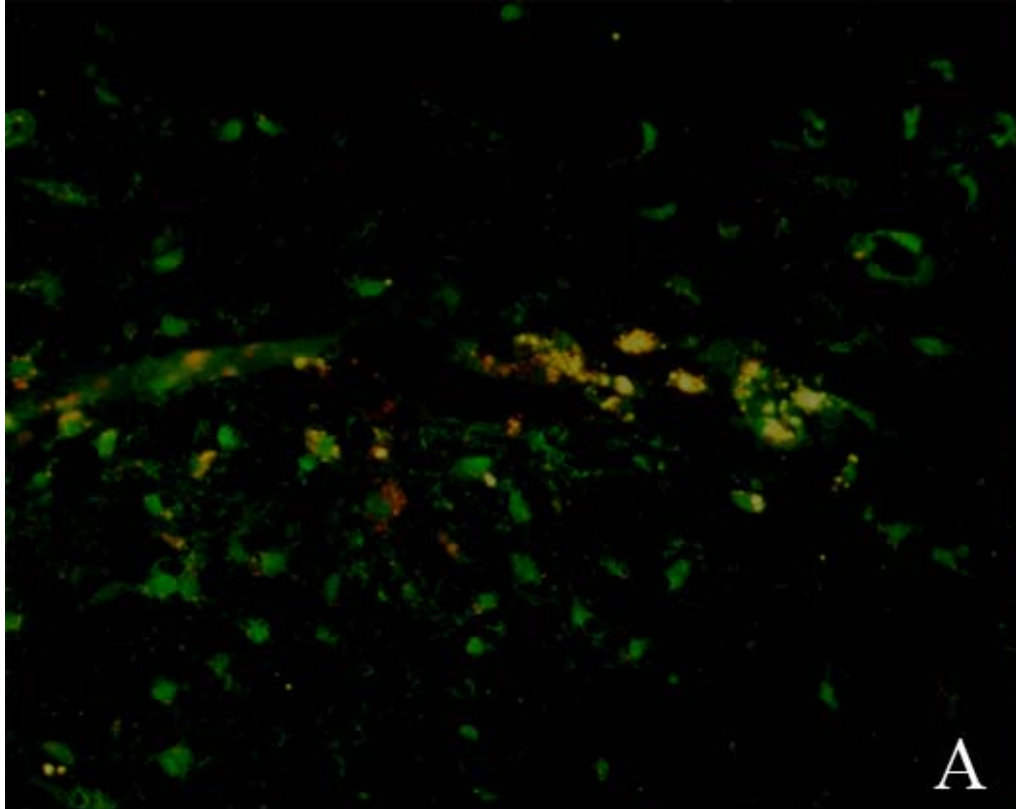

A

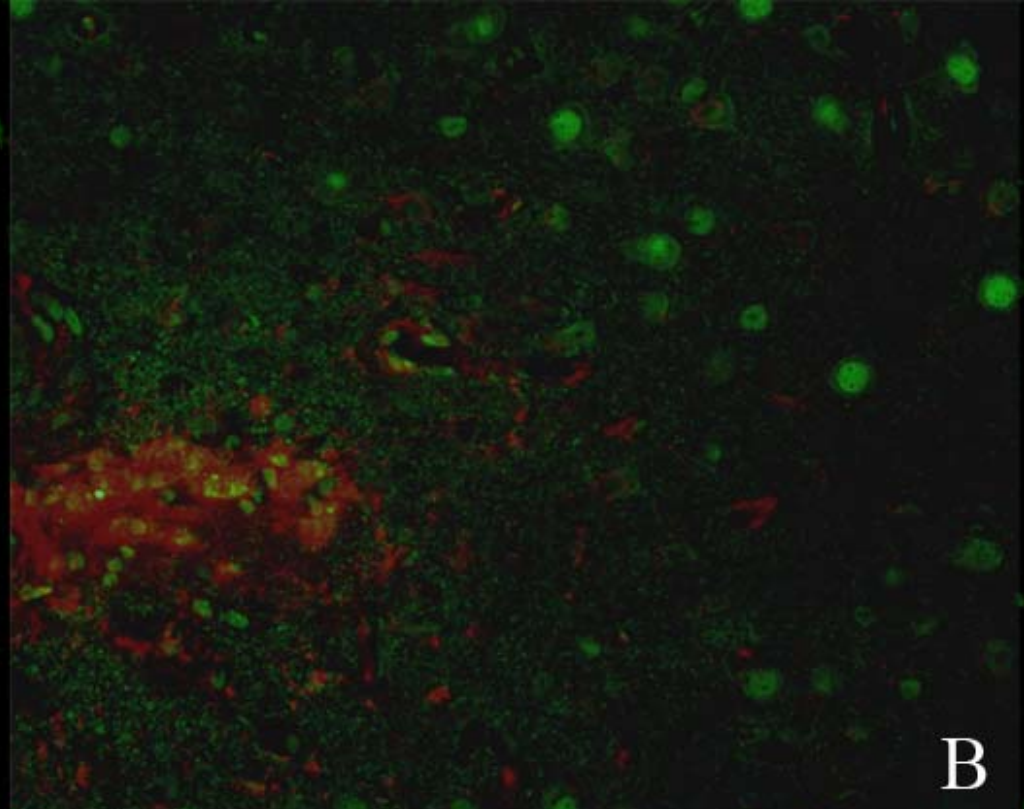

B

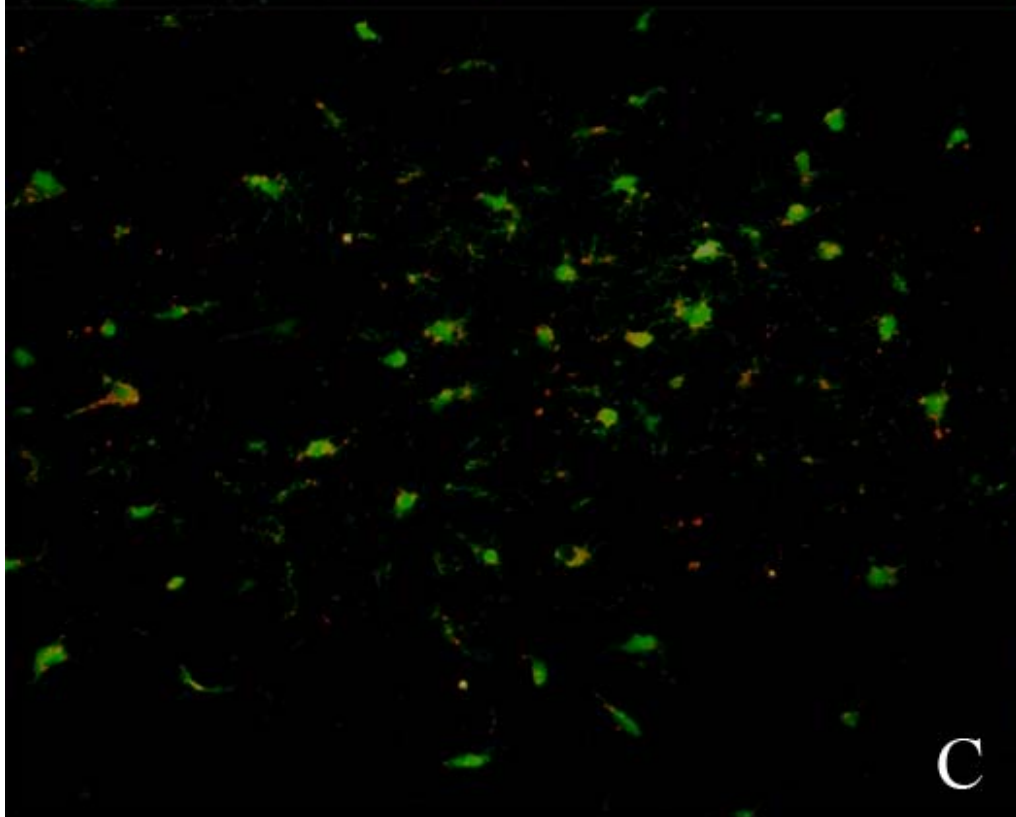

C

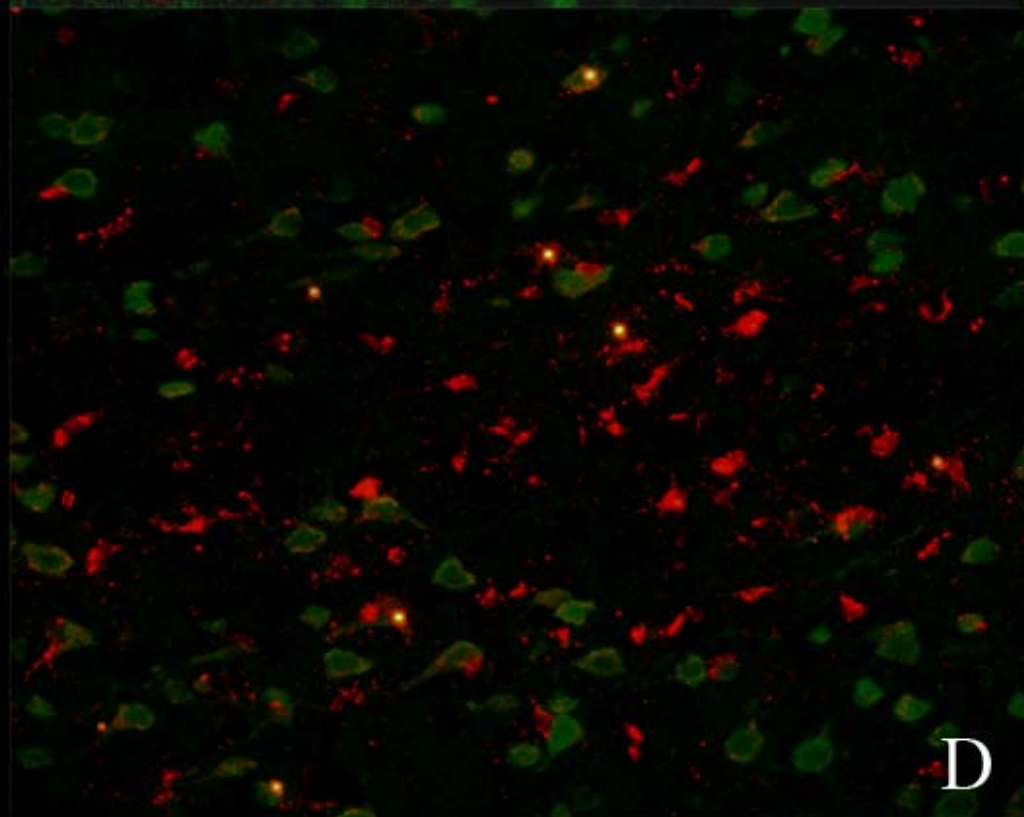

D

Supplement: mmc6.pdf [file mmc6.pdf]

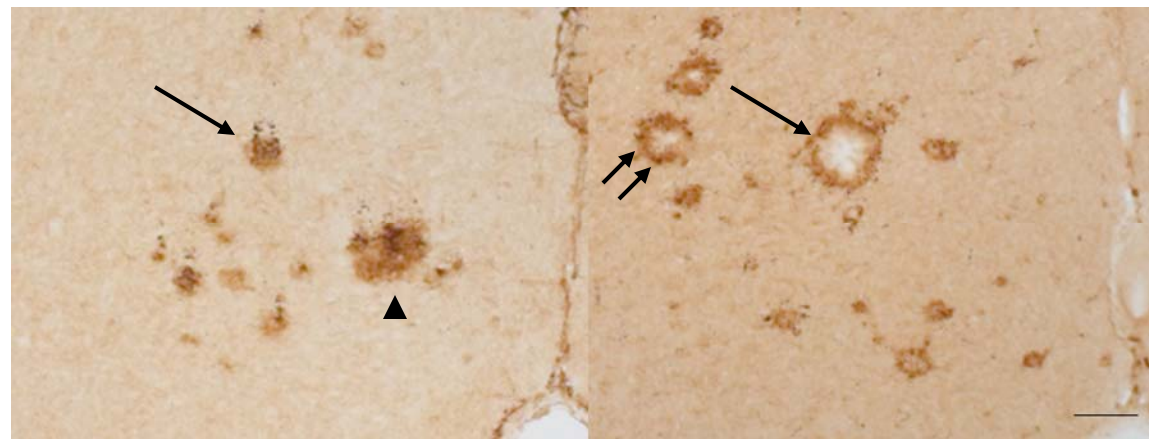

4G8

Progranulin

scale 50um

Supplement: mmc7.pdf [file mmc7.pdf]
